# Supplementary material
Source: publisher figshare collection journal article supplement (https://sage.figshare.com/ndownloader/files/23297021)
Supplement: Supplementary file 1 [file 23297021]

## Sheet: Wall
front wall	Part1	Part2	Part3	Part4
	23.75	24.1	23.86	24.2	℃
back wall	Part1	Part2	Part3	Part4
	22.39	23.28	23.97	22.68	℃
Row	1	2	3	4	5	6	7	8	9	10	11	12
1	23.2	22.96	23.15	20.84	23.65	22.43	24.74	23.23	23.25	22.03	23.19	23.12	℃
2	23.34	23.12	23.47	20.59	24.24	24.2	24.99	23.82	23.98	21.67	23.51	22.86	℃
3	23.86	23.1	23.12	20.41	23.2	23.09	24.86	24.75	23.9	21.06	23.4	22.85	℃
4	23.69	23.04	23.02	20.8	23.7	23.09	24.65	24.54	24.44	21.32	23.8	23.04	℃
5	23.83	23.02	23.4	20.51	23.79	22.72	24.78	23.64	23.61	21.07	23.82	23.09	℃
6	23.44	22.89	22.9	20.31	23.37	22.94	24.51	23.73	23.73	21.25	23.79	23.08	℃
7	22.88	22.77	22.48	20.08	22.73	22.3	24.23	23.98	24.11	21.19	22.87	22.67	℃

## Sheet: Manikin
		head	chest	belly	thigh	crus
Row1	1A	29.5	31.01	37.6	41.01	26.79	℃
	1B	29.65	30.82	37.87	40.62	26.81	℃
	1C	29.51	31.58	36.23	36.87	26.11	℃
	1D	29.23	30.56	37.96	41.08	27.76	℃
	1E	30.14	32.88	38.62	41.55	26.38	℃
	1F	30.72	32.53	40.06	41.38	27.7	℃
Row2	2A	31.02	33.24	39.22	42.68	28.37	℃
	2B	30.16	33.6	40.12	40.91	26.03	℃
	2C	29.64	32.81	38.41	40.08	26.6	℃
	2D	30.74	32.87	38.52	40.53	27.91	℃
	2E	30.79	34.04	40.1	40.13	27.09	℃
	2F	31.38	33.56	39.61	40.14	27.67	℃
Row3	3A	30.15	32.7	38.71	40.83	27.46	℃
	3B
	3C	29.99	31.33	33.85	33.75	31.05	℃
	3D	28.69	29.98	37.24	36.24	26.53	℃
	3E
	3F	30.91	32.44	38.54	39.78	26.2	℃
Row4	4A	30.16	32.56	34.05	34.45	30.83	℃
	4B	29.71	32.96	33.52	35.09	31.27	℃
	4C	28.65	31.13	33.07	34.09	31.87	℃
	4D	28.68	30.31	31.56	31.76	30.71	℃
	4E	29.79	31.26	33.55	34.53	31.9	℃
	4F	30.39	32.02	34.67	34.44	31.63	℃
Row5	5A	30.33	32.31	38.61	42.09	28.09	℃
	5B	30.21	32.11	37.59	41.32	28.33	℃
	5C	28.56	30.73	36.36	38.73	28.42	℃
	5D	29.69	31.59	38.33	40.82	26.13	℃
	5E	30.35	32.61	39.21	40.96	27.23	℃
	5F	30.45	32.44	40.4	42.34	27.26	℃
Row6	6A	29.47	31.81	39.09	41.27	27.17	℃
	6B	30.1	32.91	39.62	42.12	26.32	℃
	6C	29.63	30.94	37.75	33.71	28.98	℃
	6D	30.79	32.91	38.27	40.87	25.86	℃
	6E	30.91	32.65	38.88	41.8	25.92	℃
	6F	30.34	32.5	40.26	39.71	26.36	℃
Row7	7A	29.87	31.34	37.52	41.13	26.53	℃
	7B	29.97	32.34	37.22	41.28	26.87	℃
	7C	29.03	30.26	35.83	37.28	25.42	℃
	7D	29.57	31.28	37.2	37.85	25.25	℃
	7E	30.2	31.69	38.14	40.82	26.23	℃
	7F	29.1	33.07	36.58	38.07	24.65	℃
